# Supplementary material for: Intra-CSF AAV9 and AAVrh10 Administration in Nonhuman Primates: Promising Routes and Vectors for Which Neurological Diseases?
Source: PubMed Central journal article supplement — Mol Ther Methods Clin Dev. 2020 Apr 11;17:771–84. doi: 10.1016/j.omtm.2020.04.001 (PMC7184633; doi:10.1016/j.omtm.2020.04.001), 2020-04-11
Supplement: mmc1.pdf [file mmc1.pdf]

## **Supplemental Information**

### **Intra-CSF AAV9 and AAVrh10 Administration in Nonhuman Primates: Promising Routes and Vectors for Which Neurological Diseases?**

**Karim Bey, Johan Deniaud, Laurence Dubreil, Béatrice Joussemet, Joseph Cristini, Carine Ciron, Juliette Hordeaux, Morwenn Le Boulc'h, Kevin Marche, Maud Maquigneau, Michaël Guilbaud, Rosalie Moreau, Thibaut Larcher, Jack-Yves Deschamps, Marion Fusellier, Véronique Blouin, Caroline Sevin, Nathalie Cartier, Oumeya Adjali, Patrick Aubourg, Philippe Moullier, and Marie-Anne Colle**

1 **Supplemental Information**

2

3 *Video S1: ICV contrast solution administration into right lateral ventricle in NHPs.*

4

5 *Figure S1: Focus on the ventral horns of thoracic and lumbar spinal cord of AAV-injected NHPs.*

6 Longitudinal section of the thoracic **(A)** and lumbar **(B)** spinal cord of Mac 3 NHP injected with AAV9-GFP by LIT-

7 KT injection demonstrating GFP expression across 5 mm. Scale bar = 1 mm. White hatched window into left panels

8 picture represents the focus of the ventral horn presented into the right panels. Scale bar = 150  $\mu$ m.

9

10 *Figure S2: Transduced-cell type identification throughout spinal cord following AAV9 intra-CSF delivery.*

11 AAV9 cell-specific tropism was determined in brain representative sections from NHPs injected by LIT-KT and ICV.

12 Brain tissues were immunolabelled using Olig 2, GFAP, Iba1 and NeuN primaries for oligodendrocytes, astrocytes,

13 microglial cells and neuron phenotyping, respectively, and an Alexa 555 (red channel)-coupled secondary antibody

14 was used for cell detection. GFP was determined by native GFP fluorescence signal imaging (green channel). Main

15 images show Alexa 555/GFP merged fluorescence signals. Scale bar = 100  $\mu$ m. Hatched windows indicate regions

16 with GFP-positive cells, and insets show higher magnification on cells harbouring both fluorescence signals: Alexa

17 555 (left) and GFP (right) channels. Scale bar = 25  $\mu$ m.

18

19 *Figure S3: Assessment of GFP specificity in NHP spinal cord and GFP-positive motor neurons quantification.*

20 Confocal microscopy spectral images of the monkey ventral horn spinal cord were taken to determine the

21 autofluorescence and native GFP fluorescence signal in the NHP spinal cord by using linear unmixing to separate

22 native GFP spectra from autofluorescence spectra. To demonstrate the specificity with which GFP fluorescence

23 is distinguished from autofluorescence, spectral imaging analysis was performed in **(A)** Mac 3 monkeys that

24 received scAAV9-CBA-GFP. **(B)** The autofluorescence spectrum was determined by analysis of PBS-injected

25 monkeys. Scale bar = 50  $\mu$ m. **(C)** Graphical representation of the spectrum profile of the autofluorescence signal

26 spectrum (**○**) and native GFP spectrum (**■**) demonstrating distinct emission wavelengths. **(D)** Quantification of

27 ChAT/GFP colocalization in MN in cervical, thoracic and lumbar spinal cord of each NHP used in the study.

28

29 *Figure S4: Brain analysed sections and GFP expression mapping.*

30 **(A)** Representative macroscopic dissection of the NHP brain included in the study. GFP expression mapping was

31 performed in right hemisphere coronal sections 4, 16 and 23. Adapted from Colle et al. [10] **(B)** In coronal section 4,  
32 25- $\mu$ m cryosection was performed, and GFP expression was analysed by confocal microscopy in the frontal cortex  
33 (inset). In coronal section 16, GFP expression was analysed in the parietal cortex (inset 5), temporal cortex (inset 2),  
34 hippocampus (inset 1), body of caudate nucleus (inset 3), and putamen (inset 4). In coronal section 23, GFP expression  
35 was analysed in the fourth ventricle area of the brain stem (inset 1) and in the cerebellum (inset 2). Scale bar = 150  $\mu$ m.  
36

37 *Figure S5: Histopathological examination of the cervical, thoracic and lumbar DRGs.*

38 Haematoxylin, eosine and saffron staining were performed in cervical, thoracic and lumbar DRGs of all NHPs  
39 included in the study. Photomicrographs presented in the figure demonstrate representative histopathological lesions  
40 found in AAVrh10- and AAV9-LIT-KT-injected monkeys. Black arrows show mononuclear cell infiltration and black  
41 arrowhead point myelin digestion chambers in DRGs. Scale bar = 150  $\mu$ m.  
42

43 *Figure S6: GFP expression in peripheral organs*

44 GFP expression in peripheral organs following AAVrh10- and AAV9-LIT-KT and AAV9-ICV injection in NHP.  
45 Peripheral tissues were counter stained with 4',6-diamidino-2-phenylindole (DAPI) and native GFP expression  
46 was microscopically evaluated in the thymus, the spleen, the lung, the kidney, the jejunum and the testis. Scale  
47 bar = 150  $\mu$ m (thymus – jejunum) and 50  $\mu$ m (testis). White hatched windows represent the focus in one region of  
48 interest, presented into the left panels of each main photomicrograph. Scale bar = 50  $\mu$ m (thymus – jejunum) and 10  
49  $\mu$ m.  
50

51 *Figure S7: GFP is expressed surrounding the Virchow-Robin space.*

52 Representative confocal imaging was performed in injected NHPs brain 25- $\mu$ m cryosection for the identification of the  
53 Virchow-Robin perivascular space and GFP expression in that same area. Endothelial cells and GFP are demonstrated  
54 by using red channels and green channels, respectively. Lumens of vessels are demonstrated by asterisks. Scale bar =  
55 100  $\mu$ m.  
56

57

58

59

60

61

61 *Table S1: Cellular and humoral immune responses against the GFP transgene.*

62  
63  
64  
65  
66  
67  
68  
69  
70  
71

| <i>Animal identification</i> | <i>Route</i> | <i>Capsid</i> | <i>IFN <math>\gamma</math> ELISPOT *<sup>a</sup></i> |                    | <i>Anti-GFP IgG antibodies</i> |           |            |               |
|------------------------------|--------------|---------------|------------------------------------------------------|--------------------|--------------------------------|-----------|------------|---------------|
|                              |              |               | <i>PBMC</i>                                          | <i>Splenocytes</i> | <i>d3</i>                      | <i>d7</i> | <i>d10</i> | <i>d Euth</i> |
| Mac 1                        | IT           | 10            | +                                                    | +                  | NA                             | NA        | NA         | 1/20480       |
| Mac 2                        | IT           | 10            | -                                                    | -                  | nd                             | nd        | nd         | nd            |
| Mac 3                        | IT           | 9             | +                                                    | -                  | nd                             | nd        | nd         | 1/2560        |
| Mac 4                        | IT           | 9             | +                                                    | +                  | nd                             | nd        | nd         | 1/2560        |
| Mac 5                        | IT           | 9             | -                                                    | -                  | nd                             | nd        | nd         | nd            |
| Mac 6                        | IT           | 9             | -                                                    | -                  | nd                             | nd        | nd         | 1/163840      |
| Mac 7                        | ICV          | 9             | -                                                    | +                  | nd                             | nd        | nd         | nd            |
| Mac 8                        | ICV          | 9             | -                                                    | +                  | nd                             | nd        | nd         | nd            |

\* GFP peptid pools; <sup>a</sup>: ELISPOT was performed at euthanasia time point; d: day; +: positive responder to GFP peptide pools  
- : negative responder to GFP peptide pools; NA: not available sample; nd: not determine

72  
73  
74  
75  
76  
77  
78  
79  
80  
81  
82  
83

84 Figure S1

85

86

87

88

89

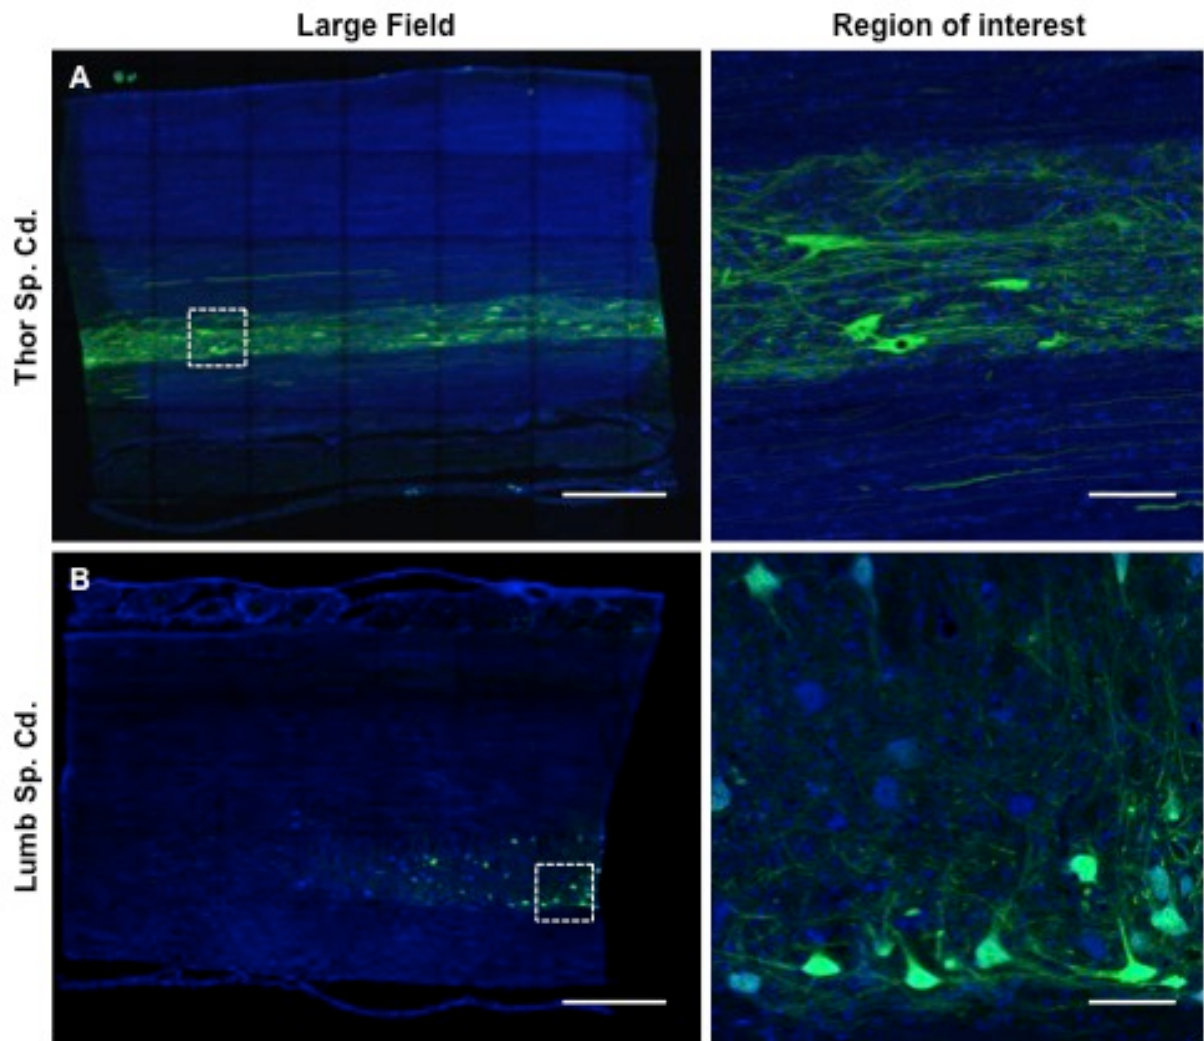

90

91

92

93

94

95

96

97 Figure S2

98

99

100

101

102

103

104

105

106

107

108

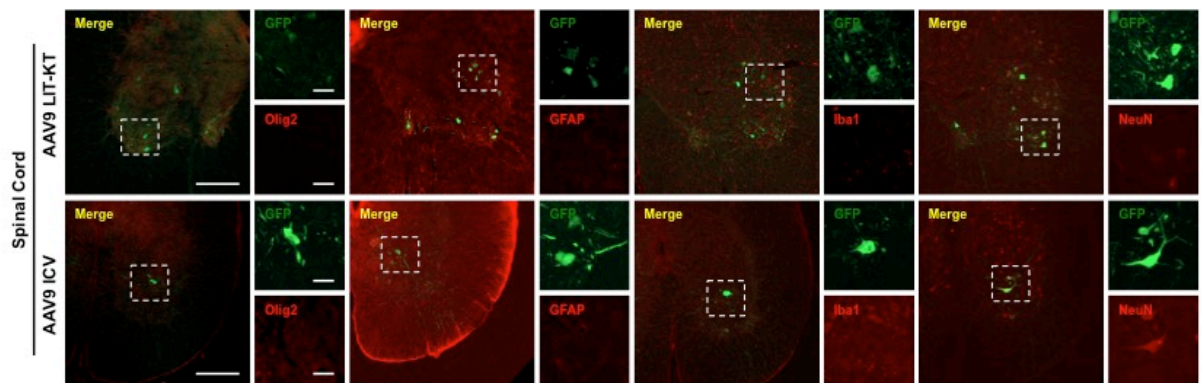

109

110

111

112

113

114

115

116

117

118

119

120

121 Figure S3

122

123

124

125

126

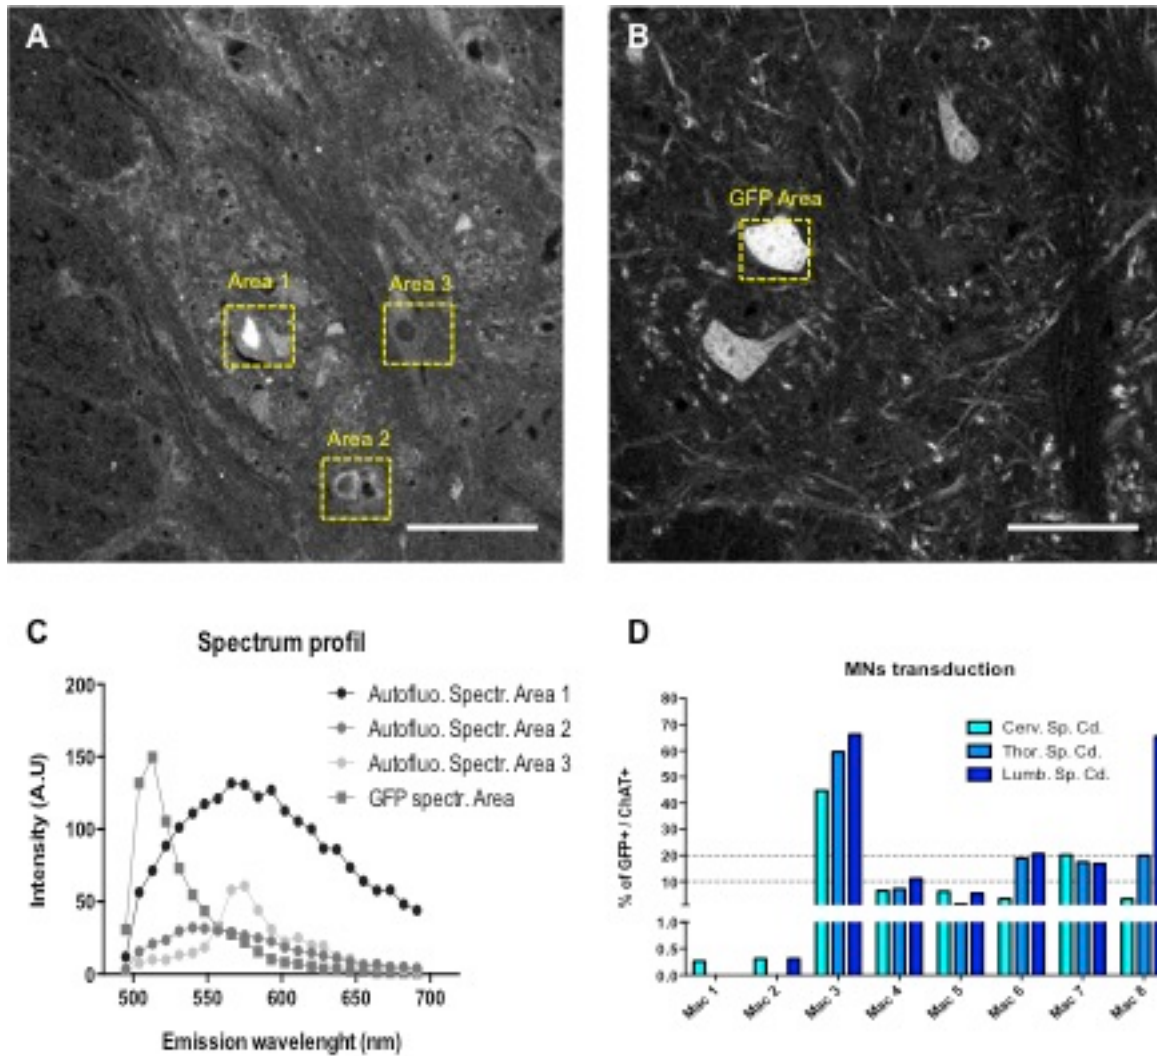

127

128

129

130

131

132

133 Figure S4

134

135

136

137

138

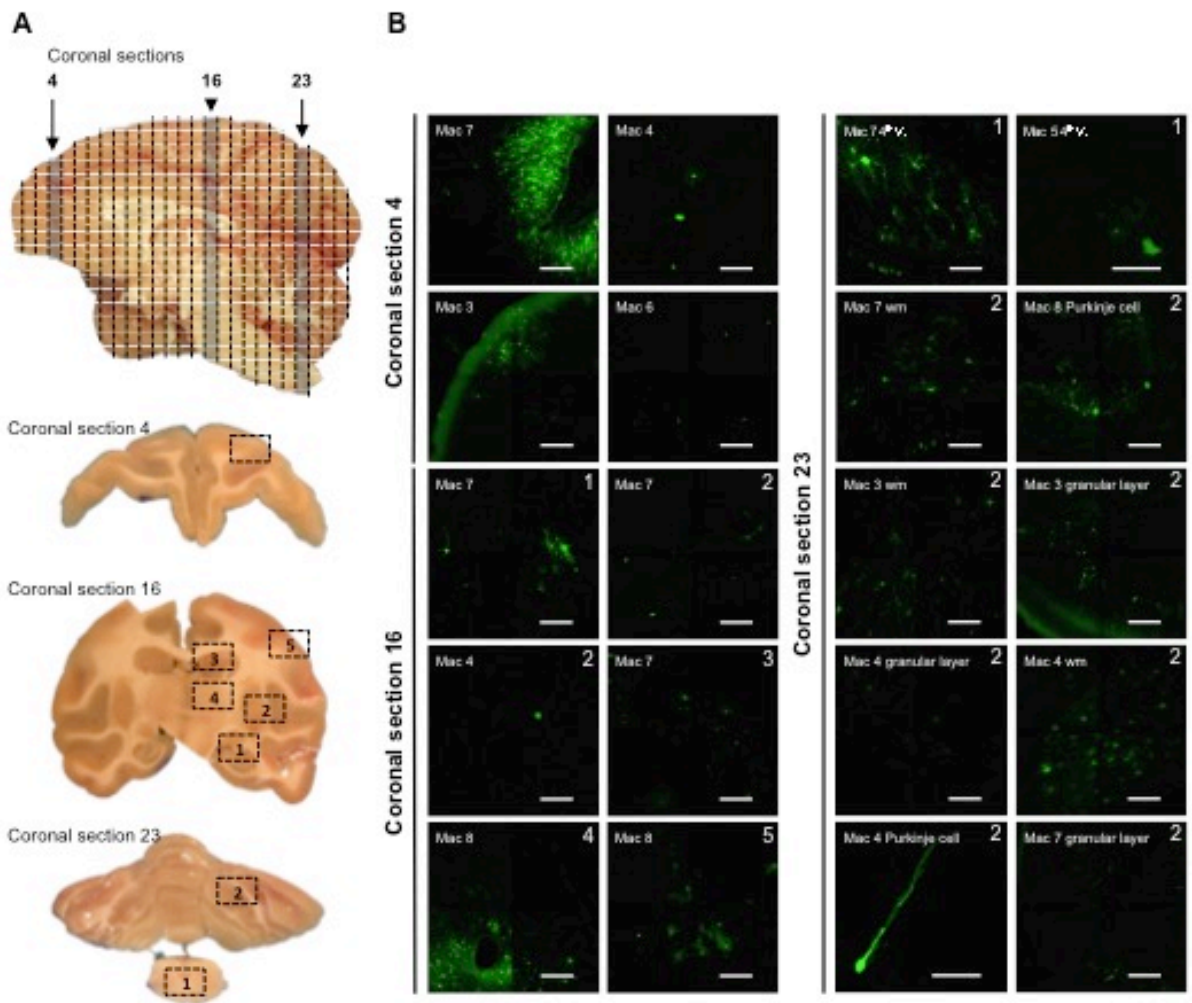

139

140

141

142

143

144

145



146 Figure S5

147

148

149

150

151

152

153

154

155

156

157

158

159

160

161

162

163

164

165

166

167

168

169

170

171

172

173

174

175

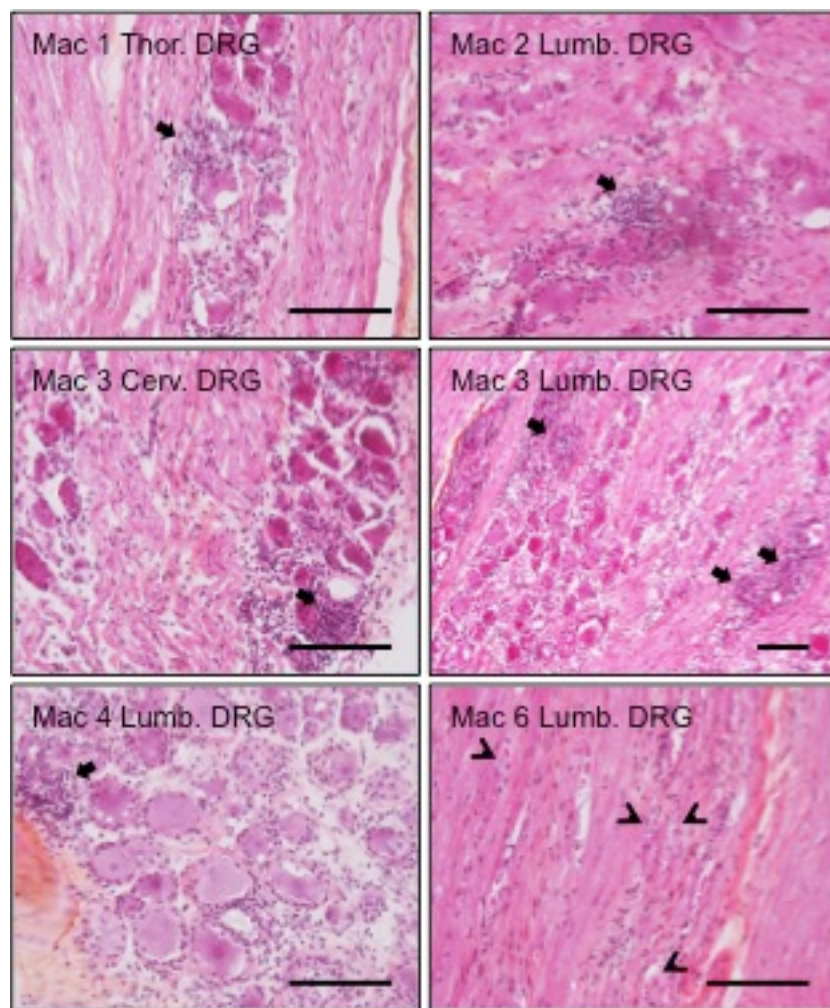

177

178

179

180

181

182

183

184

185

186

187

188

189

190

191

192

193

194

195

196

197

198

199

200

201

202

203

204

205

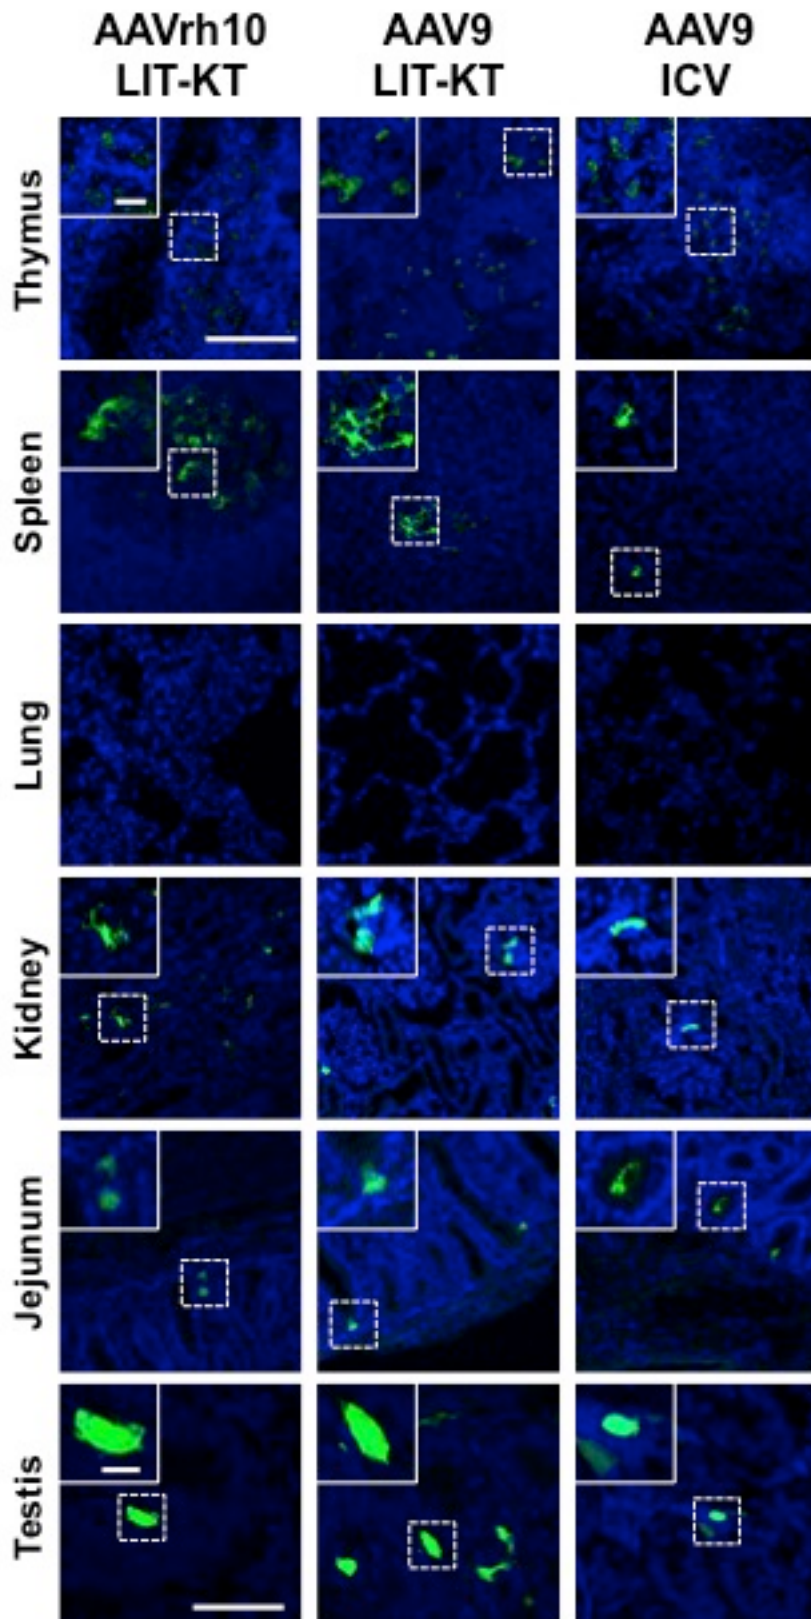

206 Figure S7

207

208

209

210

211

212

213

214

215

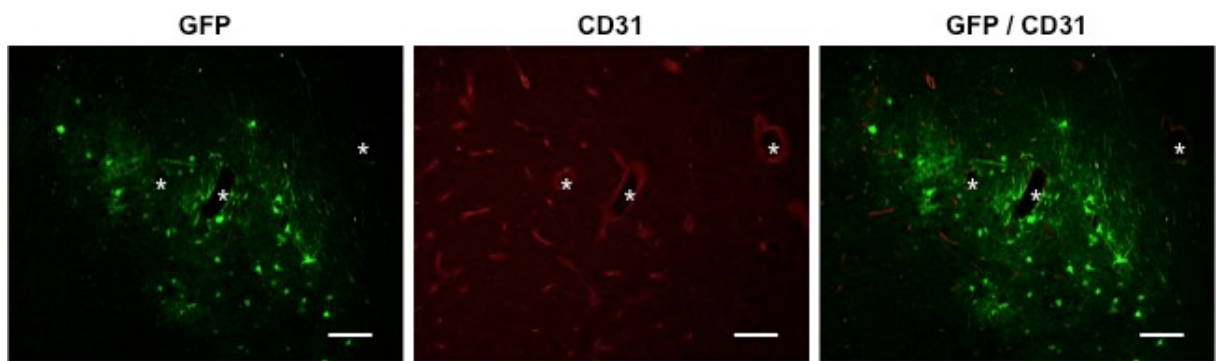

216 Video S1  
217  
218  
219  
220

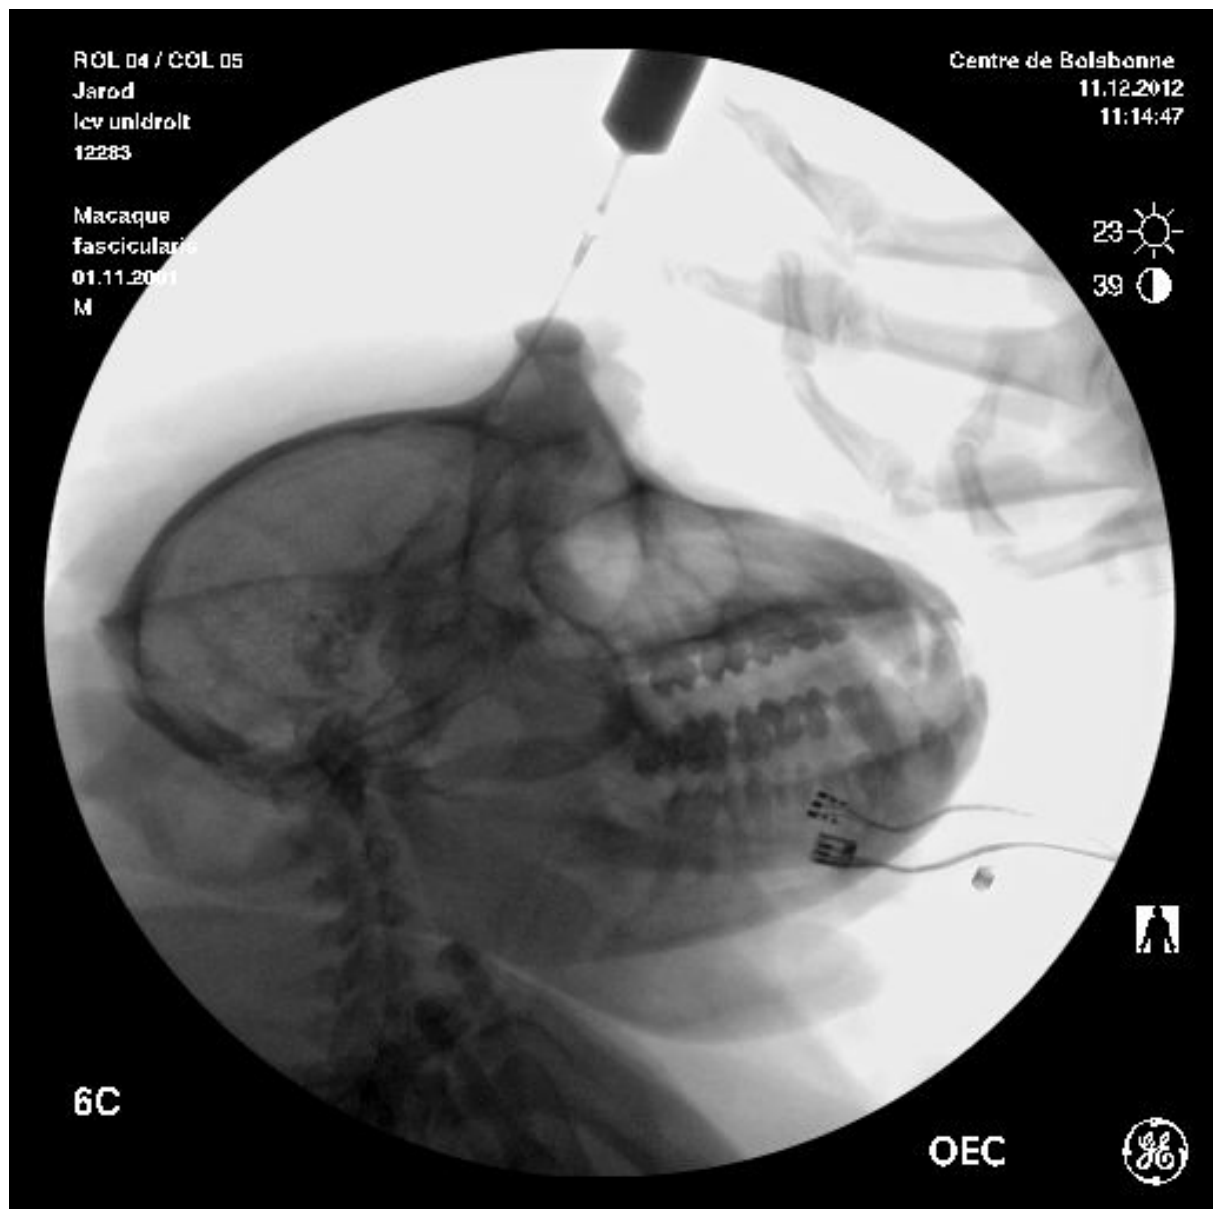

221  
222  
223  
224  
225

226 **Supplemental Methods**

227

228 *Detection of anti-transgene humoral response*

229 The presence of anti-GFP antibodies in primate sera was assessed by enzyme-linked immunosorbent assay  
230 (ELISA). Briefly, Nunc Maxisorp P96 plate (Thermo) was coated with 5 µg / mL of recombinant GFP protein  
231 (Merck). After an overnight incubation at + 4 °C, the wells were washed, saturated and incubated with two-fold  
232 dilutions of serum from 1/10 to 1/327,680. After 2 hours at 37 °C and a washing step, the wells were incubated  
233 for 1 hour at 37 °C with horseradish peroxidase (HRP)-conjugated anti-Rhesus immunoglobulin G (IgG,  
234 Southern Biotech). Signals were revealed using 2,2-3,3',5,5'-tetramethylbenzidine (TMB, Becton Dickinson)  
235 according to the manufacturer's recommendations. Absorbance was read at 450 nm with a correction at 570 nm  
236 on a Multiskan Go reader (Thermo). Threshold positivity was established from the mean of the optical density  
237 obtained for each dilution + 2SD from 22 negative sera obtained from naïve primates. IgG titers for experimental  
238 animals were defined as the highest serum dilution with an optical density that remained above the threshold.

239

240 *Detection of the anti-transgene cellular response by using an interferon gamma (IFN-γ) enzyme-linked*  
241 *immunospot assay (ELISpot)*

242 Briefly, peripheral blood mononuclear cells (PBMCs) collected at euthanasia were thawed and dispatched at  
243 2E+5 cells into human anti-IFN-γ (MabTech) precoated polyvinylidene difluoride membrane Multiscreen® high  
244 throughput filter plates (Millipore). PBMCs were incubated with 5 peptide pools covering the GFP sequence  
245 (overlapping peptide library 15 per 10 mers; Sigma-Aldrich). Pools were replaced by culture medium alone for  
246 negative control or Concanavalin A for positive control. After 48 h of incubation at 37 °C in 5 % CO<sub>2</sub>, the wells  
247 were washed and incubated with a biotinylated anti-IFN-γ antibody (clone 7-B6-1) MabTech and then with  
248 ExtrAvidin® alkaline phosphatase (Sigma Aldrich). The reaction was revealed using BCIP/NBT substrate  
249 (Thermo), spots were counted using an ELISpot Reader ELR07 (AID) and analysed with the AID ELISpot  
250 reader software v7.0. Only responses at least threefold higher than the negative control and above 50 spot-  
251 forming colonies per million cells were considered positive.
